# Supplementary material for: Enzymatic modification ofd-mannose alleviates DSS-induced colonic inflammation in mice through macrophage polarization mediated by PPARγ
Source: Royal Society of Chemistry journal article supplement (doi:10.1039/d1fo03897d), 2022-01-01
Supplement: d1fo03897d1.pdf [file d1fo03897d1.pdf]

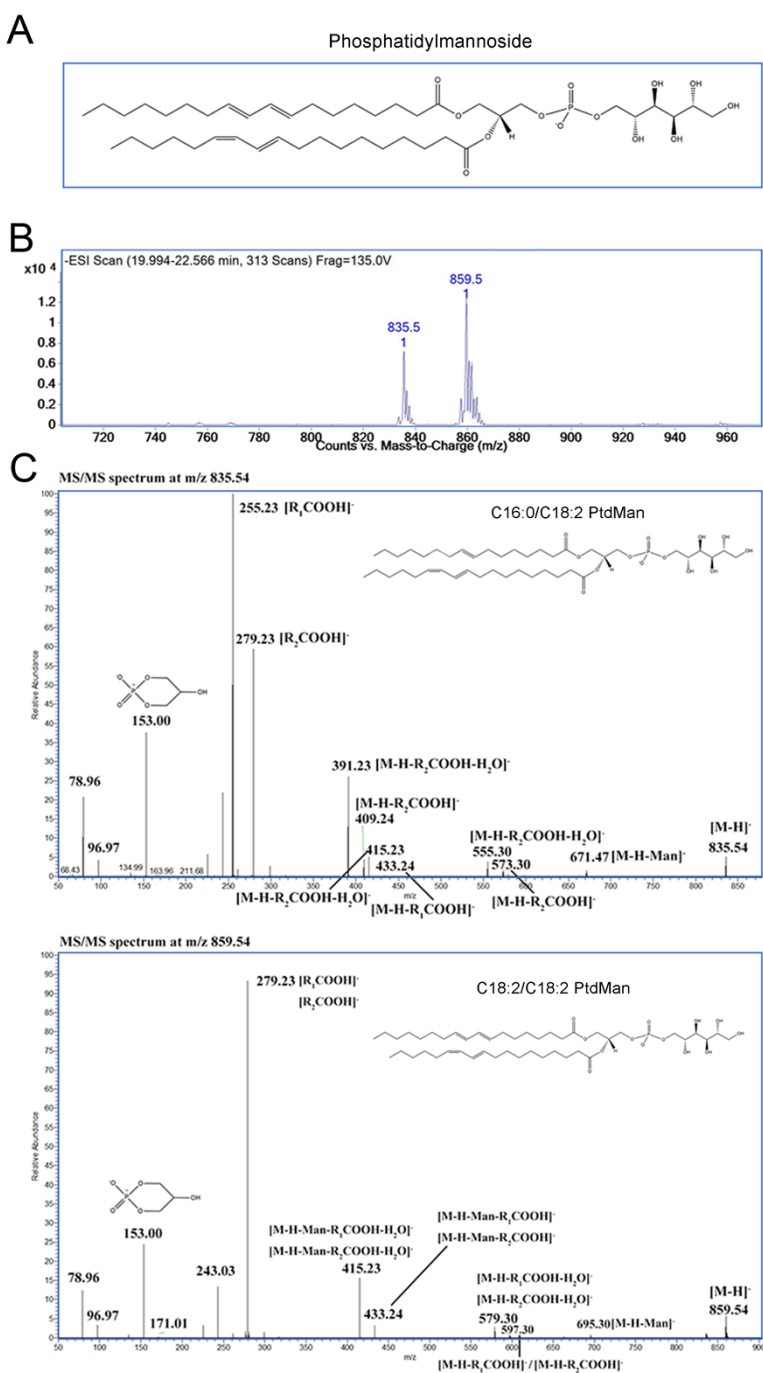

Fig. S1 Phosphatidylmannoside was synthesized via the approach of phospholipase D mediated transphosphatidylation. (A) Structure of phosphatidylmannoside. (B) ESI full MS of phosphatidylmannoside. (C) MS/MS spectrum at m/z 835.5 and 859.5.

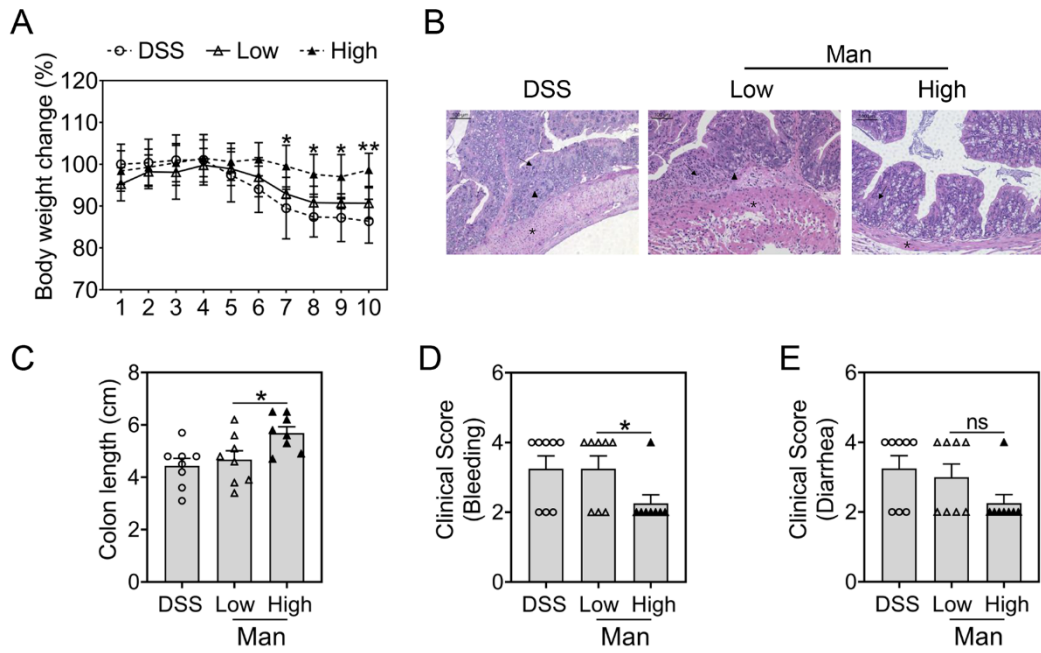

Fig. S2 D-mannose ameliorated DSS-induced colitis. Mice received 7 days of 3% DSS dissolved in sterile distilled water *ad libitum* and followed by 3 days of regular drinking water to induce acute colitis. At the same time, mice were oral gavage with the low dose and high dose of Man (200  $\mu$ l of 2% (w/v) or 20% (w/v) mannose, respectively). (A) Body weight. (B) H&E-stained sections of colons. Inflammatory cell infiltration was founded in mucosa and submucosa (asterisk), loss of crypt (arrow) and mucosal architecture (arrowheads) were also founded. Scale bar: 100  $\mu$ m. (C) Colon length. (D and E) Disease activity index that calculated as stool consistency and bleeding. Data are expressed as means  $\pm$  SEM, \* $p$  < 0.05, \*\* $p$  < 0.01 vs the low dose of Man group.
